# Supplementary material for: Characterization of Different Sources of Human MSCs Expanded in Serum-Free Conditions with Quantification of Chondrogenic Induction in 3D
Source: Hindawi journal article supplement (doi:10.1155/2019/2186728), 2019-06-20

## Supplementary Materials

**Supplementary Figure 1:** List of antibodies used for the immunophenotypic analysis.

**Supplementary Figure 2:** Presentation of the different combinations of antibodies coupled to fluorochromes that were used for the immunophenotypic analysis. The fluorochromes and their excitation wavelength are indicated in color. In a first screening panel, 27 markers were examined by dispatching combinations of antibodies over 6 tubes (top table). In a second screening panel, 4 additional markers were analyzed in a single tube (bottom table).

**Supplementary Figure 3:** Representative flow cytometric histograms of "classical", exclusion and "advanced characterization" markers expressed on BM-MSCs cultivated at passage 1, under serum free conditions. Percentage of positive cells is represented as mean  $\pm$  SD. (*blue*: isotype control, *black*: FMO control, *red*: sample).

**Supplementary Figure 4:** Oligonucleotide primers used for the real-time polymerase chain reaction analyses. The references of the studies where the primers have been designed are indicated.

**Supplementary Figure 5:** Growth characteristics of MSCs and fibroblasts during long-term expansion under serum-free conditions. The doubling times are compared from passage 1 to passage 10 (n = 5 for BM-MSCs, n = 6 for WJ-MSCs, n = 8 for DP-MSCs, n = 4 for AT-MSCs and n = 3 for fibroblasts). Error bars: mean  $\pm$  SD.

**Supplementary Figure 6:** Immunophenotype of MSCs, fibroblasts and articular chondrocytes cultivated under serum-free conditions. The expression of 31 markers was analyzed by flow cytometry in cell preparations from passage 1. The values represent the percentage of positive cells and are reported as mean with standard deviation (SD). N represents the number of donors. These values correspond to the values reported in the histograms presented in Figure 2.

**Supplementary Figure 7:** Evaluation of osteogenic and adipogenic differentiation potential of MSCs, fibroblasts and articular chondrocytes. Cells were amplified for 2 passages in serum-free culture medium then induced for 21 days for osteogenic or adipogenic differentiation, in presence of 10% FBS. (a) Upper panel: after culture in osteoblastic induction medium, calcium mineralization was demonstrated by alizarin red S staining. A representative example from three experiments is shown (n = 3). Lower panel: quantification of alizarin red S staining and relative mRNA expression of *RUNX2* and *ALPL* is shown, relative to non-induced, control cells (reference value = 1). (b) Upper panel: after culture in adipogenic induction medium, lipid droplets are revealed in the cytoplasm with oil red O staining. Note the absence of lipid droplets in the fibroblast population. A representative example from three experiments is shown (n = 3). Lower panel: quantification of oil red O staining and relative mRNA expression of *LEP* and *PPARG* is shown, relative to non-induced, control cells (reference value = 1). Error bars: mean  $\pm$  SD (n = 3). \* Indicates statistically significant differences between induced cells and control cells (\*p < 0.05, \*\*p < 0.01 and \*\*\*p < 0.001). The scale bar corresponds to 100  $\mu$ m.

**Supplementary Figure 8:** Cell viability of BM-MSCs cultivated under serum-free conditions in agarose hydrogel. P1 BM-MSCs amplified in serum-free SPE-IV medium were embedded in agarose hydrogel. The constructs were then cultivated in serum-free chondrogenic BT $\beta$ 3 medium (containing high glucose DMEM, 1 mM sodium pyruvate, 50  $\mu$ g/mL L-ascorbate-2-phosphate, 0.1  $\mu$ M dexamethasone, 1% ITS, 50 ng/mL BMP-2, 10 ng/mL TGF- $\beta$ 3) alone (a) or supplemented with 5% serum-free SPE-IV medium (b). The cell viability was evaluated by using the Cellstain double staining kit (dead cells stain red and live cells stain green). Supplementation of the chondrogenic medium with 5% SPE-IV medium maintained good viability of BM-MSCs. The photographs shown here correspond to a 10-day culture period and are representative of three experiments. The scale bar corresponds to 80  $\mu$ m.

**Supplementary Figure 9:** Validation of anti-pNIIB52 for flow cytometry analysis of type IIB procollagen expression. Nasal chondrocytes were used in these experiments. (a) Chondrocytes were amplified then cultivated for 21 days in monolayer in the presence of the chondrogenic BT $\beta$ 3 cocktail, to allow chondrocyte redifferentiation. The chondrocytes were fixed, permeabilized and a titration assay was performed by incubating chondrocytes with different concentrations of anti-pNIIB52 labeled with Alexa Fluor 647 dye, in order to detect IIB expression with optimal signal to noise ratio. A representative titration assay is shown and 0.35  $\mu$ g/1 x 10<sup>6</sup> cells was the titer selected for all subsequent flow cytometry analyses. Red dots: stained samples, blue dots: unstained samples. (b) Analysis of type IIB expression by using fluorescently labeled anti-pNIIB52 in chondrocytes cultivated in different culture conditions. After amplification in monolayer, chondrocytes were negative to IIB procollagen whereas redifferentiation triggered by 21 days of BT $\beta$ 3 treatment resulted in 37.6  $\pm$  4.2% or 94.6  $\pm$  2.1% of positive cells, for chondrocytes redifferentiated in monolayer or in agarose, as

indicated. (c) Demonstration of staining specificity of anti-pNIIB52 in flow cytometry analysis. The immunizing peptide that was shown to block anti-pNIIB52 in our original Western-blotting and immunohistochemistry analyses was used here similarly in peptide competition assay. Chondrocytes amplified and redifferentiated in agarose as described in (B) were stained with anti-pNIIB52 or with anti-pNIIB52 pre-incubated with an excess of the immunizing peptide. No expression of type IIB procollagen was detected when anti-pNIIB52 was first blocked with the immunizing peptide. Percentage of positive cells is represented as mean  $\pm$  SD (n = 3).

## Supplementary Figure 1

| Target       | Format      | Vendor            | Isotype  | Reference   |
|--------------|-------------|-------------------|----------|-------------|
| CD10         | PE          | BD Biosciences    | IgG2a, κ | 555375      |
| CD13         | APC         | BD Biosciences    | IgG1, κ  | 557454      |
| CD14         | APC-H7      | BD Biosciences    | IgG2b, κ | 560180      |
| CD15         | V450        | BD Biosciences    | IgM, κ   | 642917      |
| CD29         | APC         | BD Biosciences    | IgG1, κ  | 559883      |
| CD31         | FITC        | BD Biosciences    | IgG1, κ  | 555445      |
| CD31         | APC-Cy7     | Biologend         | IgG1, κ  | 303120      |
| CD33         | V450        | BD Biosciences    | IgG2a, κ | 561157      |
| CD34         | APC         | BD Biosciences    | IgG1, κ  | 555824      |
| CD34         | PE-CF594    | BD Biosciences    | IgG1, κ  | 562383      |
| CD44         | APC-H7      | BD Biosciences    | IgG2b, κ | 560532      |
| CD45         | V500        | BD Biosciences    | IgG1, κ  | 560777      |
| CD45         | BV510       | BD Biosciences    | IgG1, κ  | 563204      |
| CD49a        | PE          | BD Biosciences    | IgG1, κ  | 559596      |
| CD56         | V450        | BD Biosciences    | IgG1, κ  | 560360      |
| CD56         | AF700       | Biologend         | IgG1, κ  | 318316      |
| CD63         | FITC        | BD Biosciences    | IgG1, κ  | 557288      |
| CD73         | PE-Cy7      | BD Biosciences    | IgG1, κ  | 561258      |
| CD79a        | BV421       | BD Biosciences    | IgG1, κ  | 562852      |
| CD90         | FITC        | BD Biosciences    | IgG1, κ  | 555595      |
| CD105        | PE          | BD Biosciences    | IgG1, κ  | 555487      |
| CD106        | FITC        | BD Biosciences    | IgG1, κ  | 551146      |
| CD133        | PE          | Miltenyi biotec   | IgG2b    | 130-090-853 |
| CD146        | FITC        | BD Biosciences    | IgG1, κ  | 560846      |
| CD146        | AF488       | Biologend         | IgG2a, κ | 342008      |
| CD166        | PE          | BD Biosciences    | IgG1, κ  | 559263      |
| CD184        | APC         | BD Biosciences    | IgG2a, κ | 555976      |
| CD271        | PerCP-Cy5.5 | BD Biosciences    | IgG1, κ  | 560834      |
| CD271        | PE-Cy7      | BD-Biosciences    | IgG1, κ  | 562852      |
| CD340        | PerCP-Cy5.5 | Biologend         | IgG1, κ  | 324416      |
| D7-Fib       | PE          | Antibodies-online | IgG2a, κ | ABIN319868  |
| HLA ABC      | V450        | BD Biosciences    | IgG1, κ  | 561346      |
| HLA DR       | V500        | BD Biosciences    | IgG1, κ  | 561224      |
| HLA G        | APC         | eBioscience       | IgG2a, κ | 17-9957-42  |
| MSCA-1       | APC         | Biologend         | IgG1, κ  | 327308      |
| Stro-1       | AF647       | Biologend         | IgM, λ   | 340104      |
| Stro-1       | PE          | Santa Cruz        | IgM, λ   | sc-47733 PE |
| α10 integrin | AF488       | Xintela Ab.       | IgG2a    | NA          |

## Supplementary Figure 2

| Laser         | PMT | Channel | tubes |             |         |             |        |             |       |             |        |        |       |             |
|---------------|-----|---------|-------|-------------|---------|-------------|--------|-------------|-------|-------------|--------|--------|-------|-------------|
|               |     |         | 1     |             | 2       |             | 3      |             | 4     |             | 5      |        | 6     |             |
| Blue 488 nm   | E   | 1       | CD90  | FITC        | CD106   | FITC        | CD63   | FITC        | CD146 | FITC        | CD31   | FITC   | CD90  | FITC        |
|               | D   | 2       | CD133 | PE          | CD105   | PE          | CD166  | PE          | CD10  | PE          | D7-Fib | PE     | CD49a | PE          |
|               | B   | 3       | CD271 | PerCP-Cy5.5 | CD271   | PerCP-Cy5.5 | CD271  | PerCP-Cy5.5 | CD271 | PerCP-Cy5.5 | 7-AAD  | 7-AAD  | CD271 | PerCP-Cy5.5 |
|               | A   | 4       | CD73  | PE-Cy7      | CD73    | PE-Cy7      | CD73   | PE-Cy7      | CD73  | PE-Cy7      | CD73   | PE-Cy7 | CD73  | PE-Cy7      |
| Red 633 nm    | C   | 5       | CD34  | APC         | HLA-G   | APC         | Stro-1 | AF647       | CD13  | APC         | CD29   | APC    | CD184 | APC         |
|               | A   | 6       | CD44  | APC-H7      | CD14    | APC-H7      | CD44   | APC-H7      | CD44  | APC-H7      | CD44   | APC-H7 | CD44  | APC-H7      |
| Violet 405 nm | B   | 7       | CD33  | V450        | HLA-ABC | V450        | CD56   | V450        | CD56  | V450        | CD15   | V450   | CD15  | V450        |
|               | A   | 8       | CD45  | V500        | HLA-DR  | V500        | CD45   | V500        | CD45  | V500        | CD45   | V500   | CD45  | V500        |

| Laser         | PMT | Channel | tube    |             |
|---------------|-----|---------|---------|-------------|
|               |     |         | 7       |             |
| Blue 488 nm   | E   | 1       | α10 ITG | AF488       |
|               | D   | 2       | Stro-1  | PE          |
|               | B   | 3       | CD340   | PerCP-Cy5.5 |
|               | C   | 4       | CD34    | PE-CF594    |
|               | A   | 5       | CD271   | PE-Cy7      |
| Red 633 nm    | C   | 6       | MSCA-1  | APC         |
|               | B   | 7       | CD56    | AF700       |
|               | A   | 8       | CD31    | APC-Cy7     |
| Violet 405 nm | B   | 9       | CD79a   | BV421       |
|               | A   | 10      | CD45    | BV510       |

Supplementary Figure 3

"Classical" MSC markers

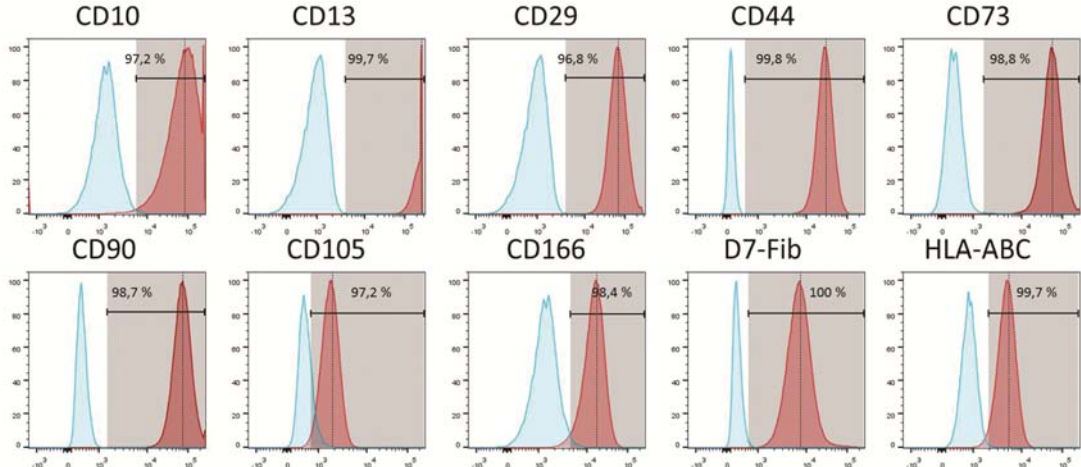

Exclusion markers

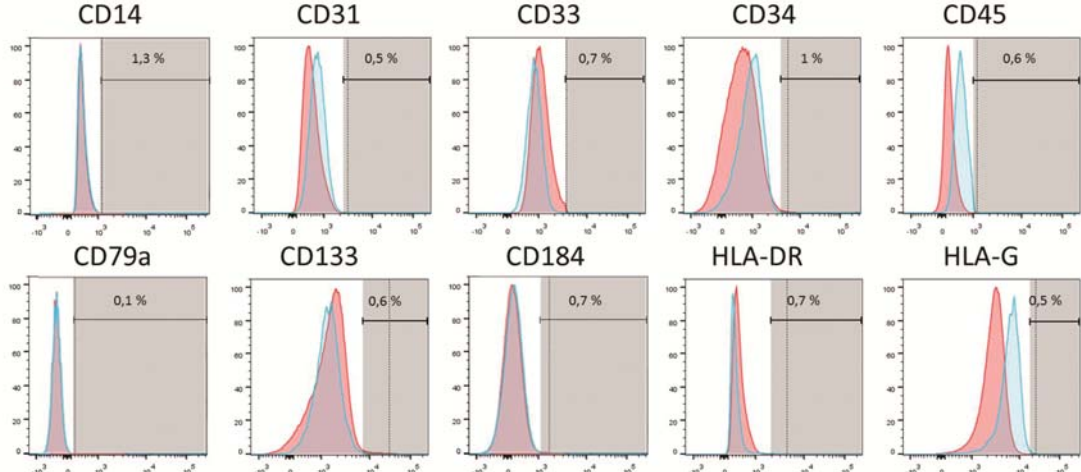

"Advanced characterization" markers

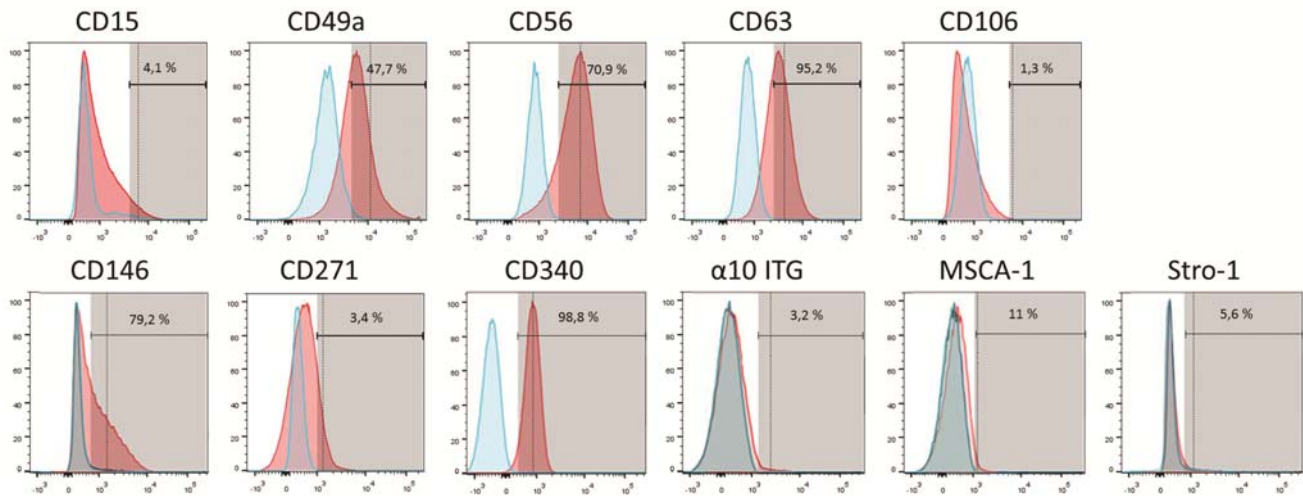

## Supplementary Figure 4

| Genes          | Primer sequence (5'-3') (F : Forward ; R : Reverse)       | References                   |
|----------------|-----------------------------------------------------------|------------------------------|
| <i>COL2A1</i>  | F : GGCAATAGCAGGTTACGTACA<br>R : CGATAACAGTCTTGCCCCACT    | Martin <i>et al.</i> [76]    |
| <i>ACAN</i>    | F : TCGAGGACAGCGAGGCC<br>R : TCGAGGGTGTAGCGGTAGAGA        | Martin <i>et al.</i> [76]    |
| <i>COL1A1</i>  | F : CAGCCGCTTCACCTACAGC<br>R : TTTTGTATTCAATCACTGTCTTGCC  | Martin <i>et al.</i> [76]    |
| <i>COL10A1</i> | F : CAAGGCACCATCTCCAGGAA<br>R : AAAGGGTATTTGTGGCAGCATATT  | Martin <i>et al.</i> [76]    |
| <i>MMP13</i>   | F : TCCTCTTCTTGAGCTGGACTCATT<br>R : CGCTCTGCAAACCTGGAGGTC | Ronzière <i>et al.</i> [52]  |
| <i>ALPL</i>    | F : GACCTCGTTGACACCTGGAAG<br>R : TTCCTGTTGAGCTCGTACTGC    | Rodriguez <i>et al.</i> [55] |
| <i>RUNX2</i>   | F : ACCAGATGGGACTGTGGTTAC<br>R : AGACGGTTATGGTCAAGGTG     | Rodriguez <i>et al.</i> [55] |
| <i>LEP</i>     | F : CACCAGGATCAATGACATTTTC<br>R : TGCCAGTGTCTGGTCCATCTTG  | Rodriguez <i>et al.</i> [55] |
| <i>PPARG</i>   | F : TCTCTCCGTAATGGAAGACC<br>R : GCATTATGAGACATCCCCAC      | Rodriguez <i>et al.</i> [55] |
| <i>GUSB</i>    | F : TGGTTGGAGAGCTCATTGG<br>R : CTCTCGCAAAGGAACGCTG        | Rodriguez <i>et al.</i> [55] |
| <i>GAPDH</i>   | F : ATGGGGAAGGTGAAGGTCTG<br>R : TAAAAGCAGCCCTGGTGACC      | Martin <i>et al.</i> [76]    |



Supplementary Figure 5

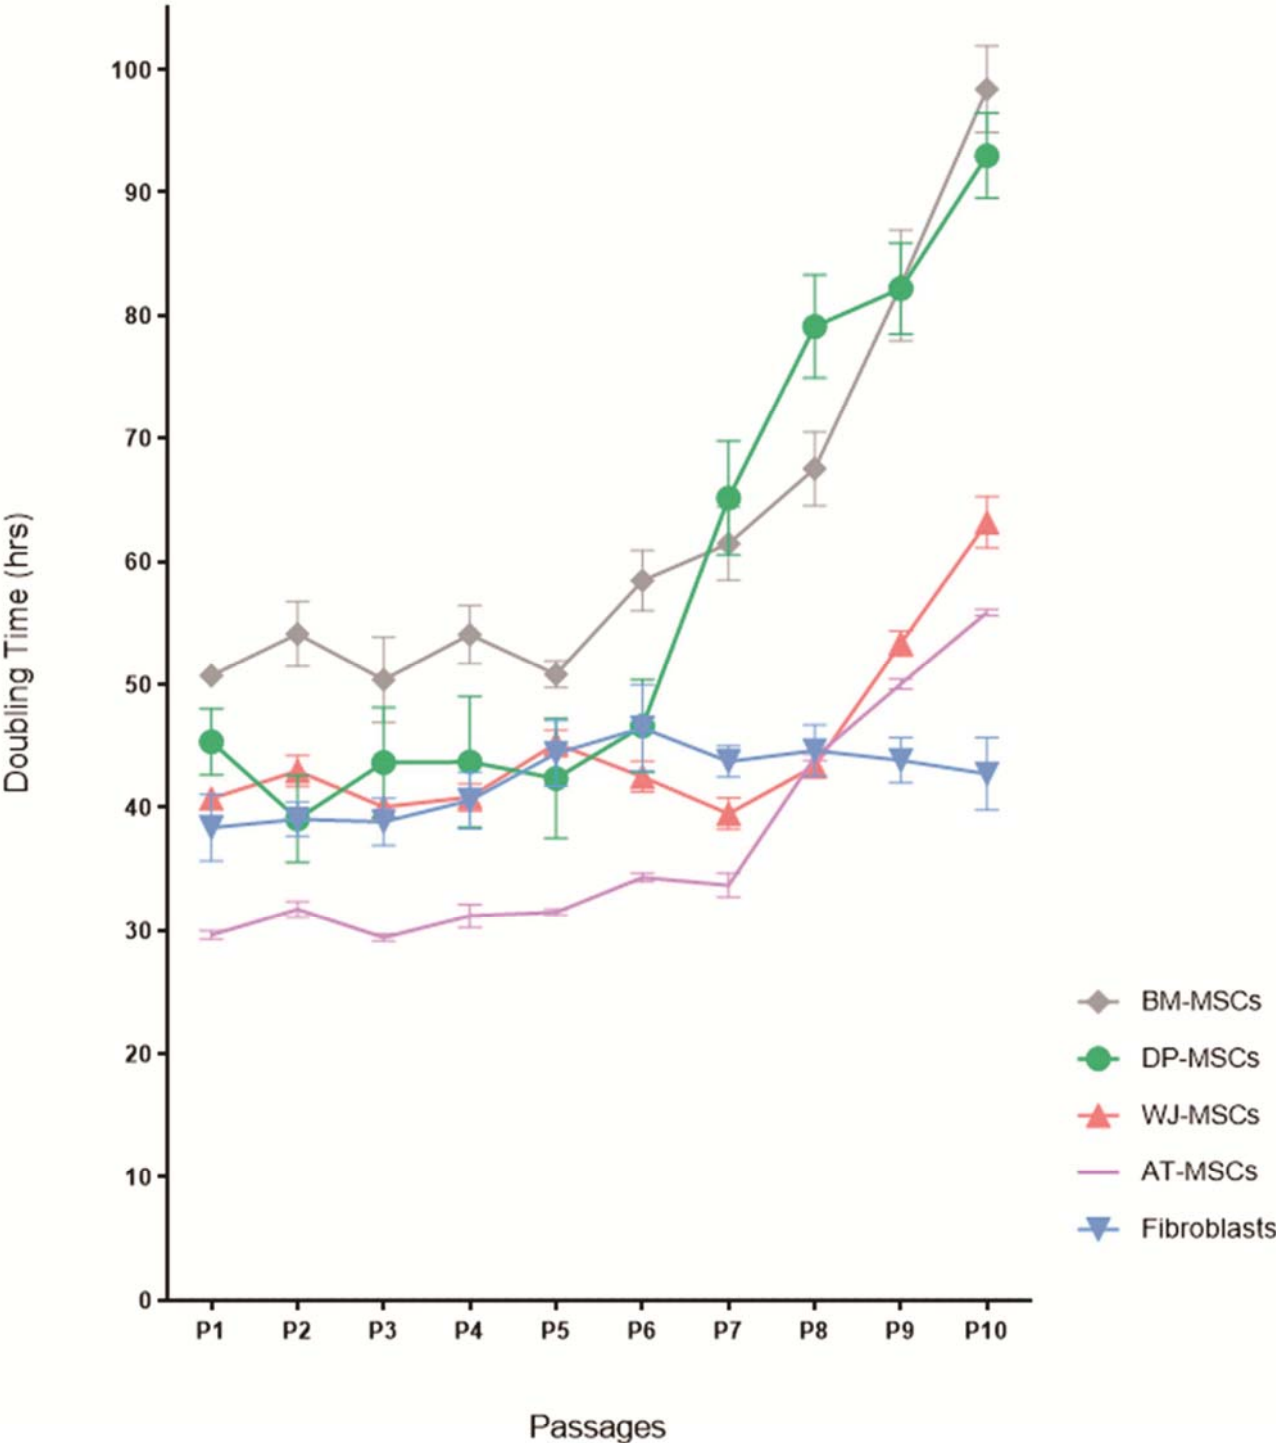

## Supplementary Figure 6

|                                     |         | BM-MSCs |      |      | WJ-MSCs |      |       | DP-MSCs |      |      | AT-MSCs |      |       | Fibroblasts |      |      | Chondrocytes |      |   |
|-------------------------------------|---------|---------|------|------|---------|------|-------|---------|------|------|---------|------|-------|-------------|------|------|--------------|------|---|
|                                     |         | Mean    | SD   | N    | Mean    | SD   | N     | Mean    | SD   | N    | Mean    | SD   | N     | Mean        | SD   | N    | Mean         | SD   | N |
| "Classical" MSC markers             | CD10    | 97.2    | 5.7  | 8    | 98.9    | 2.4  | 5     | 96.5    | 5.0  | 5    | 100.0   | 0.1  | 5     | 93.2        | 1.7  | 3    | 4.6          | 6.4  | 3 |
|                                     | CD13    | 99.7    | 0.6  | 8    | 96.3    | 5.3  | 5     | 100.0   | 0.0  | 5    | 100.0   | 0.1  | 5     | 11.7        | 12.4 | 3    | 72.0         | 0.8  | 3 |
|                                     | CD29    | 96.8    | 4.0  | 8    | 99.6    | 1.1  | 5     | 99.0    | 0.9  | 5    | 100.0   | 0.0  | 5     | 99.6        | 0.3  | 3    | 100.0        | 0.1  | 3 |
|                                     | CD44    | 99.8    | 0.9  | 8    | 99.8    | 0.7  | 5     | 100.0   | 0.0  | 5    | 100.0   | 0.1  | 5     | 100.0       | 0.0  | 3    | 90.5         | 10.0 | 3 |
|                                     | CD73    | 98.8    | 3.2  | 8    | 99.7    | 0.5  | 5     | 99.1    | 1.2  | 5    | 99.8    | 0.4  | 5     | 95.9        | 6.8  | 3    | 92.3         | 11.0 | 3 |
|                                     | CD90    | 98.7    | 3.4  | 8    | 99.8    | 0.5  | 5     | 98.3    | 2.2  | 5    | 99.7    | 0.5  | 5     | 95.6        | 6.8  | 3    | 99.4         | 0.6  | 3 |
|                                     | CD105   | 97.2    | 6.3  | 8    | 99.9    | 0.2  | 5     | 100.0   | 0.0  | 5    | 98.0    | 3.5  | 5     | 100.0       | 0.0  | 3    | 56.2         | 13.7 | 3 |
|                                     | CD166   | 98.4    | 3.4  | 8    | 99.2    | 1.3  | 5     | 100.0   | 0.0  | 5    | 95.5    | 7.3  | 5     | 100.0       | 0.1  | 3    | 51.2         | 23.3 | 3 |
|                                     | D7-Fib  | 100.0   | 0.0  | 8    | 99.8    | 0.3  | 5     | 99.9    | 0.1  | 5    | 99.7    | 0.5  | 5     | 100.0       | 0.1  | 3    | 48.3         | 15.4 | 3 |
| HLA-ABC                             | 99.7    | 0.5     | 8    | 99.9 | 0.1     | 5    | 100.0 | 0.0     | 5    | 98.4 | 3.2     | 5    | 100.0 | 0.0         | 3    | 61.9 | 14.1         | 3    |   |
| Exclusion markers                   | CD14    | 1.3     | 1.1  | 8    | 1.1     | 0.6  | 5     | 0.5     | 0.2  | 5    | 0.8     | 0.7  | 5     | 1.0         | 0.2  | 3    | 1.1          | 0.5  | 3 |
|                                     | CD31    | 0.5     | 0.4  | 8    | 0.7     | 0.8  | 5     | 0.4     | 0.2  | 5    | 0.5     | 0.6  | 5     | 0.1         | 0.0  | 3    | 0.3          | 0.2  | 3 |
|                                     | CD33    | 0.7     | 0.5  | 8    | 0.6     | 0.8  | 5     | 0.3     | 0.3  | 5    | 0.4     | 0.4  | 5     | 0.1         | 0.1  | 3    | 1.5          | 0.2  | 3 |
|                                     | CD34    | 1.0     | 0.9  | 8    | 0.7     | 0.5  | 5     | 0.5     | 0.2  | 5    | 0.5     | 0.5  | 5     | 0.1         | 0.1  | 3    | 0.1          | 0.1  | 3 |
|                                     | CD45    | 0.6     | 1.1  | 8    | 0.8     | 2.1  | 5     | 0.8     | 0.4  | 5    | 0.5     | 0.7  | 5     | 0.1         | 0.1  | 3    | 0.6          | 0.3  | 3 |
|                                     | CD79a   | 0.1     | 0.5  | 8    | 0.2     | 0.6  | 5     | 0.5     | 0.5  | 5    | 0.2     | 0.1  | 5     | 0.4         | 0.1  | 3    | 0.2          | 0.4  | 3 |
|                                     | CD133   | 0.6     | 0.3  | 8    | 0.6     | 0.7  | 5     | 0.7     | 0.1  | 5    | 0.4     | 0.2  | 5     | 0.1         | 0.0  | 3    | 0.5          | 0.4  | 3 |
|                                     | CD184   | 0.7     | 1.2  | 8    | 0.8     | 0.6  | 5     | 0.7     | 0.3  | 5    | 0.2     | 0.2  | 5     | 0.2         | 0.1  | 3    | 0.1          | 0.1  | 3 |
|                                     | HLA-DR  | 0.7     | 0.4  | 8    | 0.8     | 0.5  | 5     | 0.5     | 0.6  | 5    | 0.9     | 0.8  | 5     | 0.1         | 0.1  | 3    | 0.4          | 0.6  | 3 |
| HLA-G                               | 0.5     | 0.4     | 8    | 0.8  | 0.4     | 5    | 0.9   | 0.1     | 5    | 0.4  | 0.6     | 5    | 0.1   | 0.1         | 3    | 0.9  | 0.5          | 3    |   |
| "Advanced characterization" markers | CD15    | 4.1     | 2.3  | 8    | 4.0     | 5.3  | 5     | 5.5     | 3.9  | 5    | 16.4    | 10.1 | 5     | 93.2        | 3.3  | 3    | 2.2          | 1.1  | 3 |
|                                     | CD49a   | 47.7    | 12.2 | 8    | 65.5    | 16.1 | 5     | 99.4    | 1.0  | 5    | 54.9    | 26.2 | 5     | 99.9        | 0.1  | 3    | 54.6         | 18.7 | 3 |
|                                     | CD56    | 70.9    | 29.3 | 8    | 61.2    | 13.3 | 5     | 24.2    | 3.4  | 5    | 4.6     | 4.4  | 5     | 1.0         | 0.8  | 3    | 0.5          | 0.4  | 3 |
|                                     | CD63    | 95.2    | 10.2 | 8    | 86.9    | 13.9 | 5     | 99.8    | 0.1  | 5    | 86.2    | 9.7  | 5     | 100.0       | 0.1  | 3    | 77.4         | 3.8  | 3 |
|                                     | CD106   | 1.3     | 1.3  | 8    | 1.0     | 1.0  | 5     | 1.3     | 1.2  | 5    | 0.7     | 0.9  | 5     | 25.7        | 25.1 | 3    | 0.9          | 1.0  | 3 |
|                                     | CD146   | 79.2    | 15.4 | 8    | 36.9    | 23.7 | 5     | 41.7    | 17.0 | 5    | 6.6     | 5.8  | 5     | 1.3         | 0.6  | 3    | 0.9          | 1.2  | 3 |
|                                     | CD271   | 3.4     | 1.9  | 8    | 3.2     | 1.2  | 5     | 0.6     | 0.4  | 5    | 1.9     | 2.5  | 5     | 0.1         | 0.1  | 3    | 0.8          | 0.6  | 3 |
|                                     | CD340   | 98.8    | 3.2  | 8    | 98.8    | 3.2  | 5     | 96.1    | 2.9  | 5    | 25.8    | 11.4 | 5     | 0.6         | 0.4  | 3    | 51.2         | 11.0 | 3 |
|                                     | α10 ITG | 3.2     | 1.3  | 3    | 1.2     | 0.4  | 5     | 1.4     | 0.6  | 5    | 0.6     | 0.1  | 3     | 0.6         | 0.2  | 3    | 0.7          | 0.2  | 3 |
|                                     | MSCA-1  | 11.0    | 1.8  | 5    | 5.8     | 1.1  | 5     | 17.0    | 2.9  | 5    | 4.0     | 3.9  | 3     | 5.3         | 0.5  | 3    | 7.7          | 3.6  | 3 |
|                                     | Stro-1  | 5.6     | 1.4  | 8    | 1.3     | 0.9  | 5     | 0.3     | 0.1  | 5    | 0.4     | 0.3  | 5     | 0.8         | 0.6  | 3    | 1.1          | 1.6  | 3 |

Supplementary Figure 7

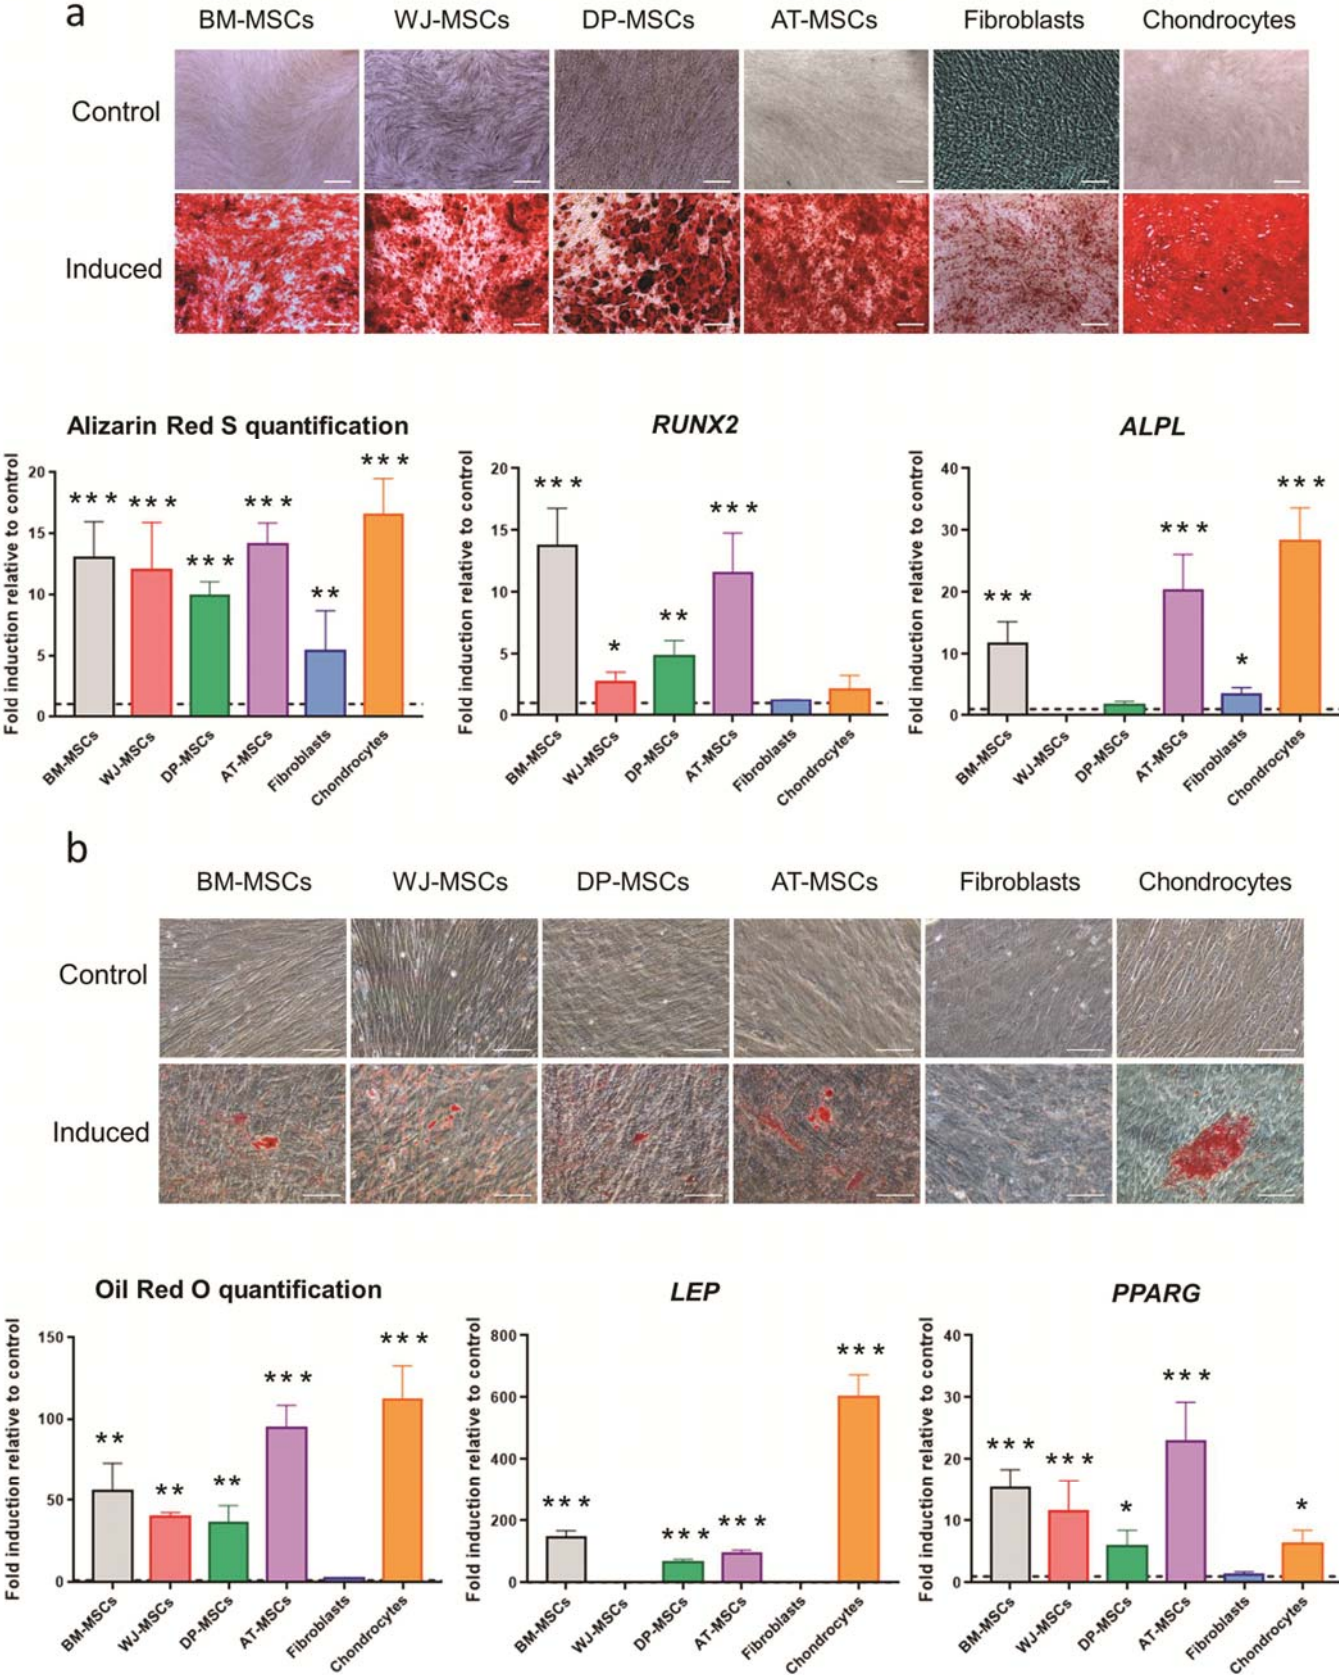

Supplementary Figure 8

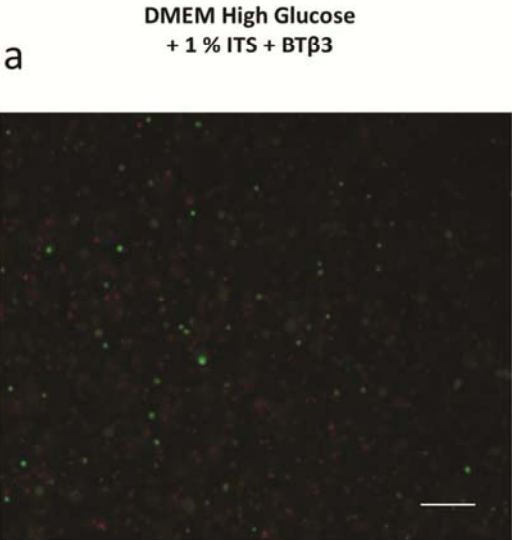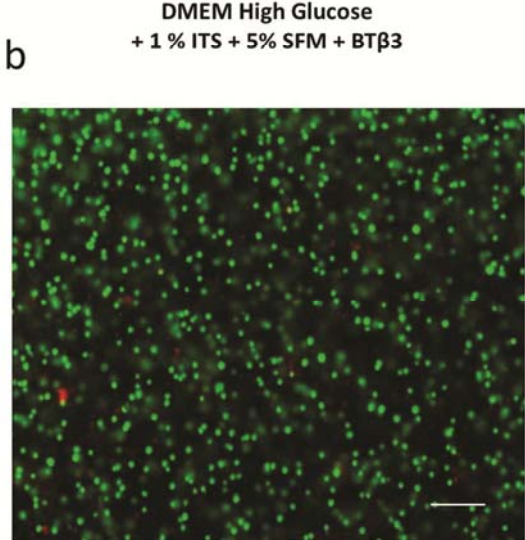

Supplementary Figure 9

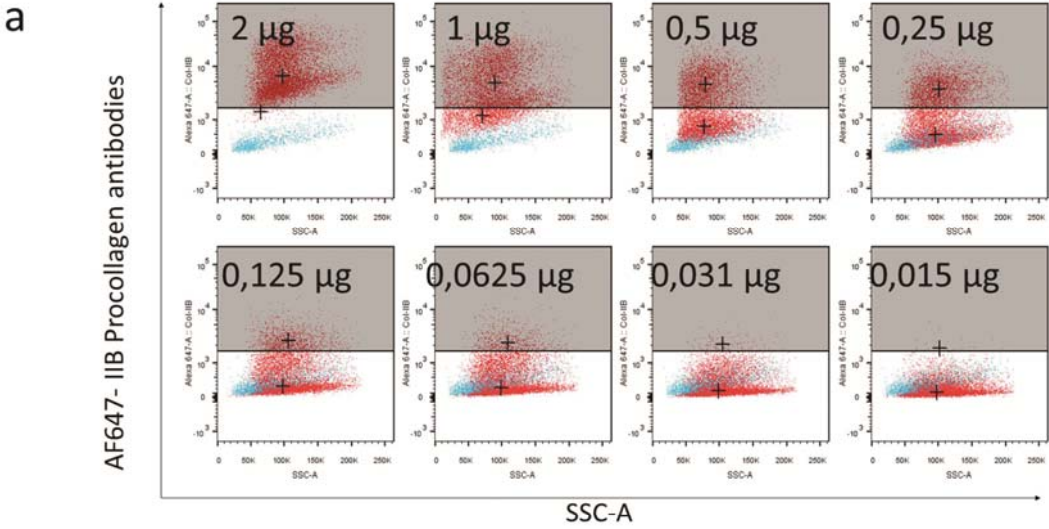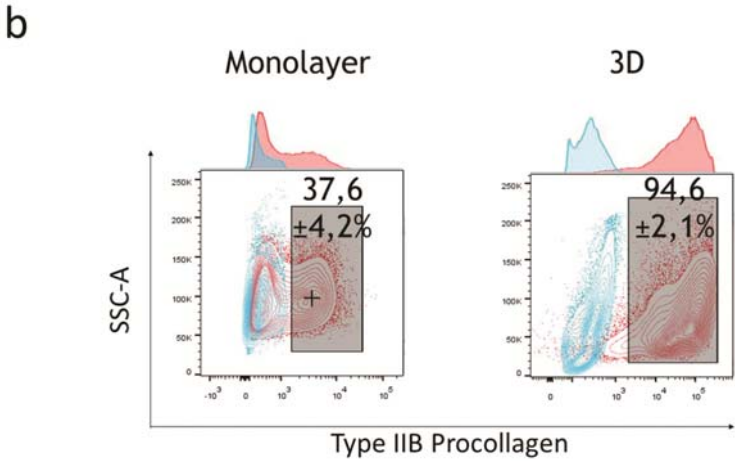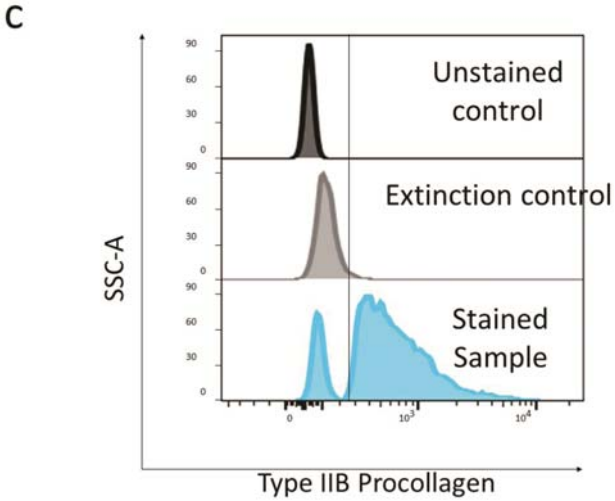

Supplement: f1 [file 2186728.f1.pdf]
